# Supplementary material
Source: ML conference proceedings conference paper supplement (https://openaccess.thecvf.com/content/CVPR2023/html/Li_Physical-World_Optical_Adversarial_CVPR_2023_paper.html)

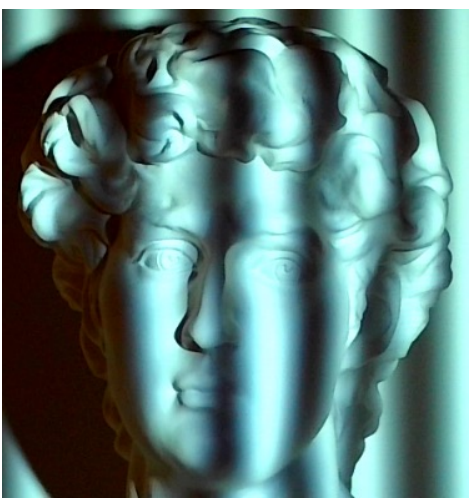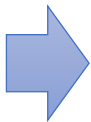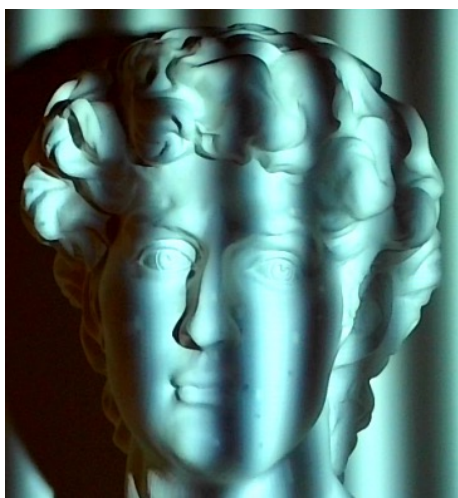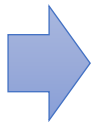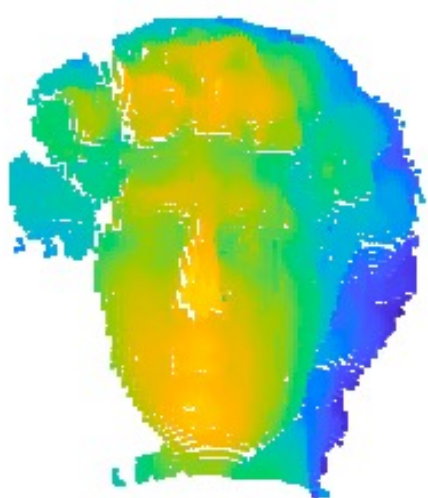

Normal Image  
David

Physical Attack  
*Athena*

Adversarial  
Point Cloud

Supplement: Supplementary file 1 [file Li_Physical-World_Optical_Adversarial_CVPR_2023_supplemental.zip]
